# Supplementary material
Source: PubMed Central journal article supplement (PMC2767172)

# CLUSTAL X (1.81) MULTIPLE SEQUENCE ALIGNMENT

File: Z: eta gamma evolution eta sequences astapa-fa-caeel-drome-humanGb15.ps  
Page 1 of 1

```
GBB-entamoeba -----LHLYMAEDQAKTIIRKRLDIPKELRANRRAKEDLWKKKFT--SEIPLGSRSDHVFKRLGHIKGIWAMHNDSTHLVSAASGDLMLVHSGDQFKLHCFIR 108
GBB-diatom -----RILKHFQKVVAMHNSDQSLVSAASGDKLIIWNAFTNKVQAIPLRL 49
plant_ancestor -----MSVAEIKERRXATXEVNXLREXLRQRXKLLLDVVARFSXAKQKTPVSPH--DLVCKRLGHHGKVVSLDHWXKXKIVSASGDKRLIWNALVSKRHAIKLXC 105
fungi_ancestor -----IAAARREARLREKXIXKXKDLADITLRAMA--XDIXLX--VMKPKRLGHLAKIYAMHWADSRHLVSAASGDKLIXWDAITNKVHAIPRLR 92
P17343 GBB1 CAEEL -----MSELDLQREABRLNITDARKACADATISLIT--NMIDPVGRI--QMRTRRLRGLHLAKIYAMHWADSRHLVSAASGDKLIIWDSYITNKVHAIPRLR 97
Q20636 GBB2 CAEEL -----MEENQPTTTEKSGYLLANAEBELRKLDDORRKLINDIPITQDRA--ERLEVMGAL--QVRSRRLRGLHLAKIYAMHWADSRHLVSAASGDKLIIWDSYITNKVHAIPRLR 110
P26308 GBB1 DROME -----MNEIDSLRREABSLNATDARKACADISLAA--TSLRPIGRI--QMRTRRLRGLHLAKIYAMHWADSRHLVSAASGDKLIIWDSYITNKVHAIPRLR 97
Q9W3J1 GBB5 DROME -----MEEAIVPANNANATKEMASLVRARNLTKLDEERQKINDVNSLNTA--ERLEQIAYV--NIKPKRVLKQHQAKVLC--DHSDFRHLIISGSGDKLIIWDAFTNKVHAIPRLR 112
P62873 GBB1 HUMAN -----MSELDLQREABRLNITDARKACADATISLIT--NMIDPVGRI--QMRTRRLRGLHLAKIYAMHWADSRHLVSAASGDKLIIWDSYITNKVHAIPRLR 97
P62879 GBB2 HUMAN -----MSELDLQREABRLNITDARKACADATISLIT--ABLDPVGRI--QMRTRRLRGLHLAKIYAMHWADSRHLVSAASGDKLIIWDSYITNKVHAIPRLR 97
P16520 GBB3 HUMAN -----MEENQPTTTEKSGYLLANAEBELRKLDDORRKLINDIPITQDRA--ERLEVMGAL--QVRSRRLRGLHLAKIYAMHWADSRHLVSAASGDKLIIWDSYITNKVHAIPRLR 97
Q9HA70 GBB4 HUMAN -----MSELDLQREABRLNITDARKACADATISLIT--NMIDPVGRI--QMRTRRLRGLHLAKIYAMHWADSRHLVSAASGDKLIIWDSYITNKVHAIPRLR 97
O14775 GBB5 HUMAN -----MCDPTFLVNVFSGDCKFKQRALRPVFKKSOQLSYCTCAEIMATGSLHENETLASLKRSEASLKLDEERAKLNDVVELHVA--ERVALGDF--VMKTRRLRGLHGNKVLCDMCKDKRIVSSGDKLIIWDSYITNKVHAIPRLR 147
ruler 1.....10.....20.....30.....40.....50.....60.....70.....80.....90.....100.....110.....120.....130.....140.....150
```

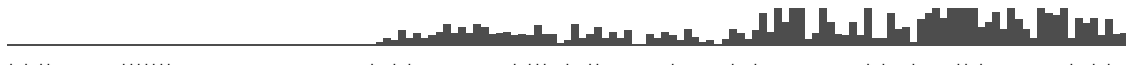

```
GBB-entamoeba -----HWVMTCAVAPF--MKFVACGGGLDNLVSIYSLAPKSSSEPLNN--LAELAGHVGLICMRRVY--DENRILVSSGDSICCLWVDSQSAKIMDK---DQADVMCVSVSPD--QNFVFGACDSMAKLWDIR--MENCVAITGHDADINAI 247
GBB-diatom -----HWVMTCAFESKKNLIACGGLDNVCSIIYVQQA--TSNARAKELVARDGVLCCRFV--DEGHVIVSSGDTTCIYWDVNSGVLKTFS---DHSKSDVMSVAISPB--NNIFVSGSDVTRAKVWDIR--NGKCVDFHIGHADINSV 187
plant_ancestor -----AWVMTCAFSPX--GVSVACGGGLDNLVSIYSLAPKSSSEPLNN--LAELAGHVGLICMRRVY--DENRILVSSGDSICCLWVDSQSAKIMDK---DQADVMCVSVSPD--QNFVFGACDSMAKLWDIR--MENCVAITGHDADINAI 252
fungi_ancestor -----HWVMTCAVAPF--GVSVACGGGLDNLVSIYSLAPKSSSEPLNN--LAELAGHVGLICMRRVY--DENRILVSSGDSICCLWVDSQSAKIMDK---DQADVMCVSVSPD--QNFVFGACDSMAKLWDIR--MENCVAITGHDADINAI 225
P17343 GBB1 CAEEL -----HWVMTCAVAPF--GVSVACGGGLDNLVSIYSLAPKSSSEPLNN--LAELAGHVGLICMRRVY--DENRILVSSGDSICCLWVDSQSAKIMDK---DQADVMCVSVSPD--QNFVFGACDSMAKLWDIR--MENCVAITGHDADINAI 232
Q20636 GBB2 CAEEL -----HWVMTCAVAPF--GVSVACGGGLDNLVSIYSLAPKSSSEPLNN--LAELAGHVGLICMRRVY--DENRILVSSGDSICCLWVDSQSAKIMDK---DQADVMCVSVSPD--QNFVFGACDSMAKLWDIR--MENCVAITGHDADINAI 248
P26308 GBB1 DROME -----HWVMTCAVAPF--GVSVACGGGLDNLVSIYSLAPKSSSEPLNN--LAELAGHVGLICMRRVY--DENRILVSSGDSICCLWVDSQSAKIMDK---DQADVMCVSVSPD--QNFVFGACDSMAKLWDIR--MENCVAITGHDADINAI 232
Q9W3J1 GBB5 DROME -----HWVMTCAVAPF--GVSVACGGGLDNLVSIYSLAPKSSSEPLNN--LAELAGHVGLICMRRVY--DENRILVSSGDSICCLWVDSQSAKIMDK---DQADVMCVSVSPD--QNFVFGACDSMAKLWDIR--MENCVAITGHDADINAI 250
P62873 GBB1 HUMAN -----HWVMTCAVAPF--GVSVACGGGLDNLVSIYSLAPKSSSEPLNN--LAELAGHVGLICMRRVY--DENRILVSSGDSICCLWVDSQSAKIMDK---DQADVMCVSVSPD--QNFVFGACDSMAKLWDIR--MENCVAITGHDADINAI 232
P62879 GBB2 HUMAN -----HWVMTCAVAPF--GVSVACGGGLDNLVSIYSLAPKSSSEPLNN--LAELAGHVGLICMRRVY--DENRILVSSGDSICCLWVDSQSAKIMDK---DQADVMCVSVSPD--QNFVFGACDSMAKLWDIR--MENCVAITGHDADINAI 232
P16520 GBB3 HUMAN -----HWVMTCAVAPF--GVSVACGGGLDNLVSIYSLAPKSSSEPLNN--LAELAGHVGLICMRRVY--DENRILVSSGDSICCLWVDSQSAKIMDK---DQADVMCVSVSPD--QNFVFGACDSMAKLWDIR--MENCVAITGHDADINAI 232
Q9HA70 GBB4 HUMAN -----HWVMTCAVAPF--GVSVACGGGLDNLVSIYSLAPKSSSEPLNN--LAELAGHVGLICMRRVY--DENRILVSSGDSICCLWVDSQSAKIMDK---DQADVMCVSVSPD--QNFVFGACDSMAKLWDIR--MENCVAITGHDADINAI 232
O14775 GBB5 HUMAN -----HWVMTCAVAPF--GVSVACGGGLDNLVSIYSLAPKSSSEPLNN--LAELAGHVGLICMRRVY--DENRILVSSGDSICCLWVDSQSAKIMDK---DQADVMCVSVSPD--QNFVFGACDSMAKLWDIR--MENCVAITGHDADINAI 287
ruler .....160.....170.....180.....190.....200.....210.....220.....230.....240.....250.....260.....270.....280.....290.....300
```

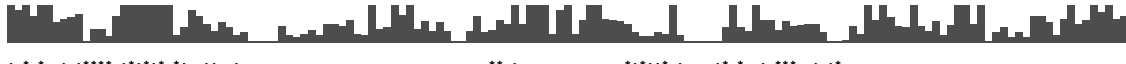

```
GBB-entamoeba -----AFPPSNGAFAPF--GSDDAICRFLDIRADRELMNYSH--ESMOHQVNSVAIS--GRIYLFQYDGLCLWVDSVLEKQ---BYITKLGHEHNRVSLGVSFDPGVALCTGSDWSTLRWVA--- 356
GBB-diatom -----AFPPSNGAFAPF--GSDDAICRFLDIRADRELMNYSH--ESMOHQVNSVAIS--GRIYLFQYDGLCLWVDSVLEKQ---BYITKLGHEHNRVSLGVSFDPGVALCTGSDWSTLRWVA--- 298
plant_ancestor -----AFPPSNGAFAPF--GSDDAICRFLDIRADRELMNYSH--ESMOHQVNSVAIS--GRIYLFQYDGLCLWVDSVLEKQ---BYITKLGHEHNRVSLGVSFDPGVALCTGSDWSTLRWVA--- 371
fungi_ancestor -----AFPPSNGAFAPF--GSDDAICRFLDIRADRELMNYSH--ESMOHQVNSVAIS--GRIYLFQYDGLCLWVDSVLEKQ---BYITKLGHEHNRVSLGVSFDPGVALCTGSDWSTLRWVA--- 301
P17343 GBB1 CAEEL -----AFPPSNGAFAPF--GSDDAICRFLDIRADRELMNYSH--ESMOHQVNSVAIS--GRIYLFQYDGLCLWVDSVLEKQ---BYITKLGHEHNRVSLGVSFDPGVALCTGSDWSTLRWVA--- 340
Q20636 GBB2 CAEEL -----AFPPSNGAFAPF--GSDDAICRFLDIRADRELMNYSH--ESMOHQVNSVAIS--GRIYLFQYDGLCLWVDSVLEKQ---BYITKLGHEHNRVSLGVSFDPGVALCTGSDWSTLRWVA--- 356
P26308 GBB1 DROME -----AFPPSNGAFAPF--GSDDAICRFLDIRADRELMNYSH--ESMOHQVNSVAIS--GRIYLFQYDGLCLWVDSVLEKQ---BYITKLGHEHNRVSLGVSFDPGVALCTGSDWSTLRWVA--- 340
Q9W3J1 GBB5 DROME -----AFPPSNGAFAPF--GSDDAICRFLDIRADRELMNYSH--ESMOHQVNSVAIS--GRIYLFQYDGLCLWVDSVLEKQ---BYITKLGHEHNRVSLGVSFDPGVALCTGSDWSTLRWVA--- 358
P62873 GBB1 HUMAN -----AFPPSNGAFAPF--GSDDAICRFLDIRADRELMNYSH--ESMOHQVNSVAIS--GRIYLFQYDGLCLWVDSVLEKQ---BYITKLGHEHNRVSLGVSFDPGVALCTGSDWSTLRWVA--- 340
P62879 GBB2 HUMAN -----AFPPSNGAFAPF--GSDDAICRFLDIRADRELMNYSH--ESMOHQVNSVAIS--GRIYLFQYDGLCLWVDSVLEKQ---BYITKLGHEHNRVSLGVSFDPGVALCTGSDWSTLRWVA--- 340
P16520 GBB3 HUMAN -----AFPPSNGAFAPF--GSDDAICRFLDIRADRELMNYSH--ESMOHQVNSVAIS--GRIYLFQYDGLCLWVDSVLEKQ---BYITKLGHEHNRVSLGVSFDPGVALCTGSDWSTLRWVA--- 340
Q9HA70 GBB4 HUMAN -----AFPPSNGAFAPF--GSDDAICRFLDIRADRELMNYSH--ESMOHQVNSVAIS--GRIYLFQYDGLCLWVDSVLEKQ---BYITKLGHEHNRVSLGVSFDPGVALCTGSDWSTLRWVA--- 340
O14775 GBB5 HUMAN -----AFPPSNGAFAPF--GSDDAICRFLDIRADRELMNYSH--ESMOHQVNSVAIS--GRIYLFQYDGLCLWVDSVLEKQ---BYITKLGHEHNRVSLGVSFDPGVALCTGSDWSTLRWVA--- 395
ruler .....310.....320.....330.....340.....350.....360.....370.....380.....390.....400.....410.....
```

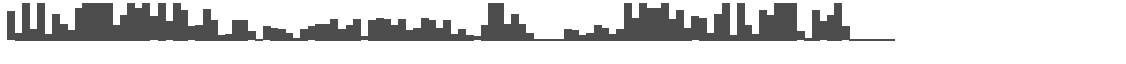

Supplement: NIHMS140695-supplement-03.pdf [file NIHMS140695-supplement-03.pdf]
