# Supplementary material
Source: PubMed Central journal article supplement (PMC2767172)

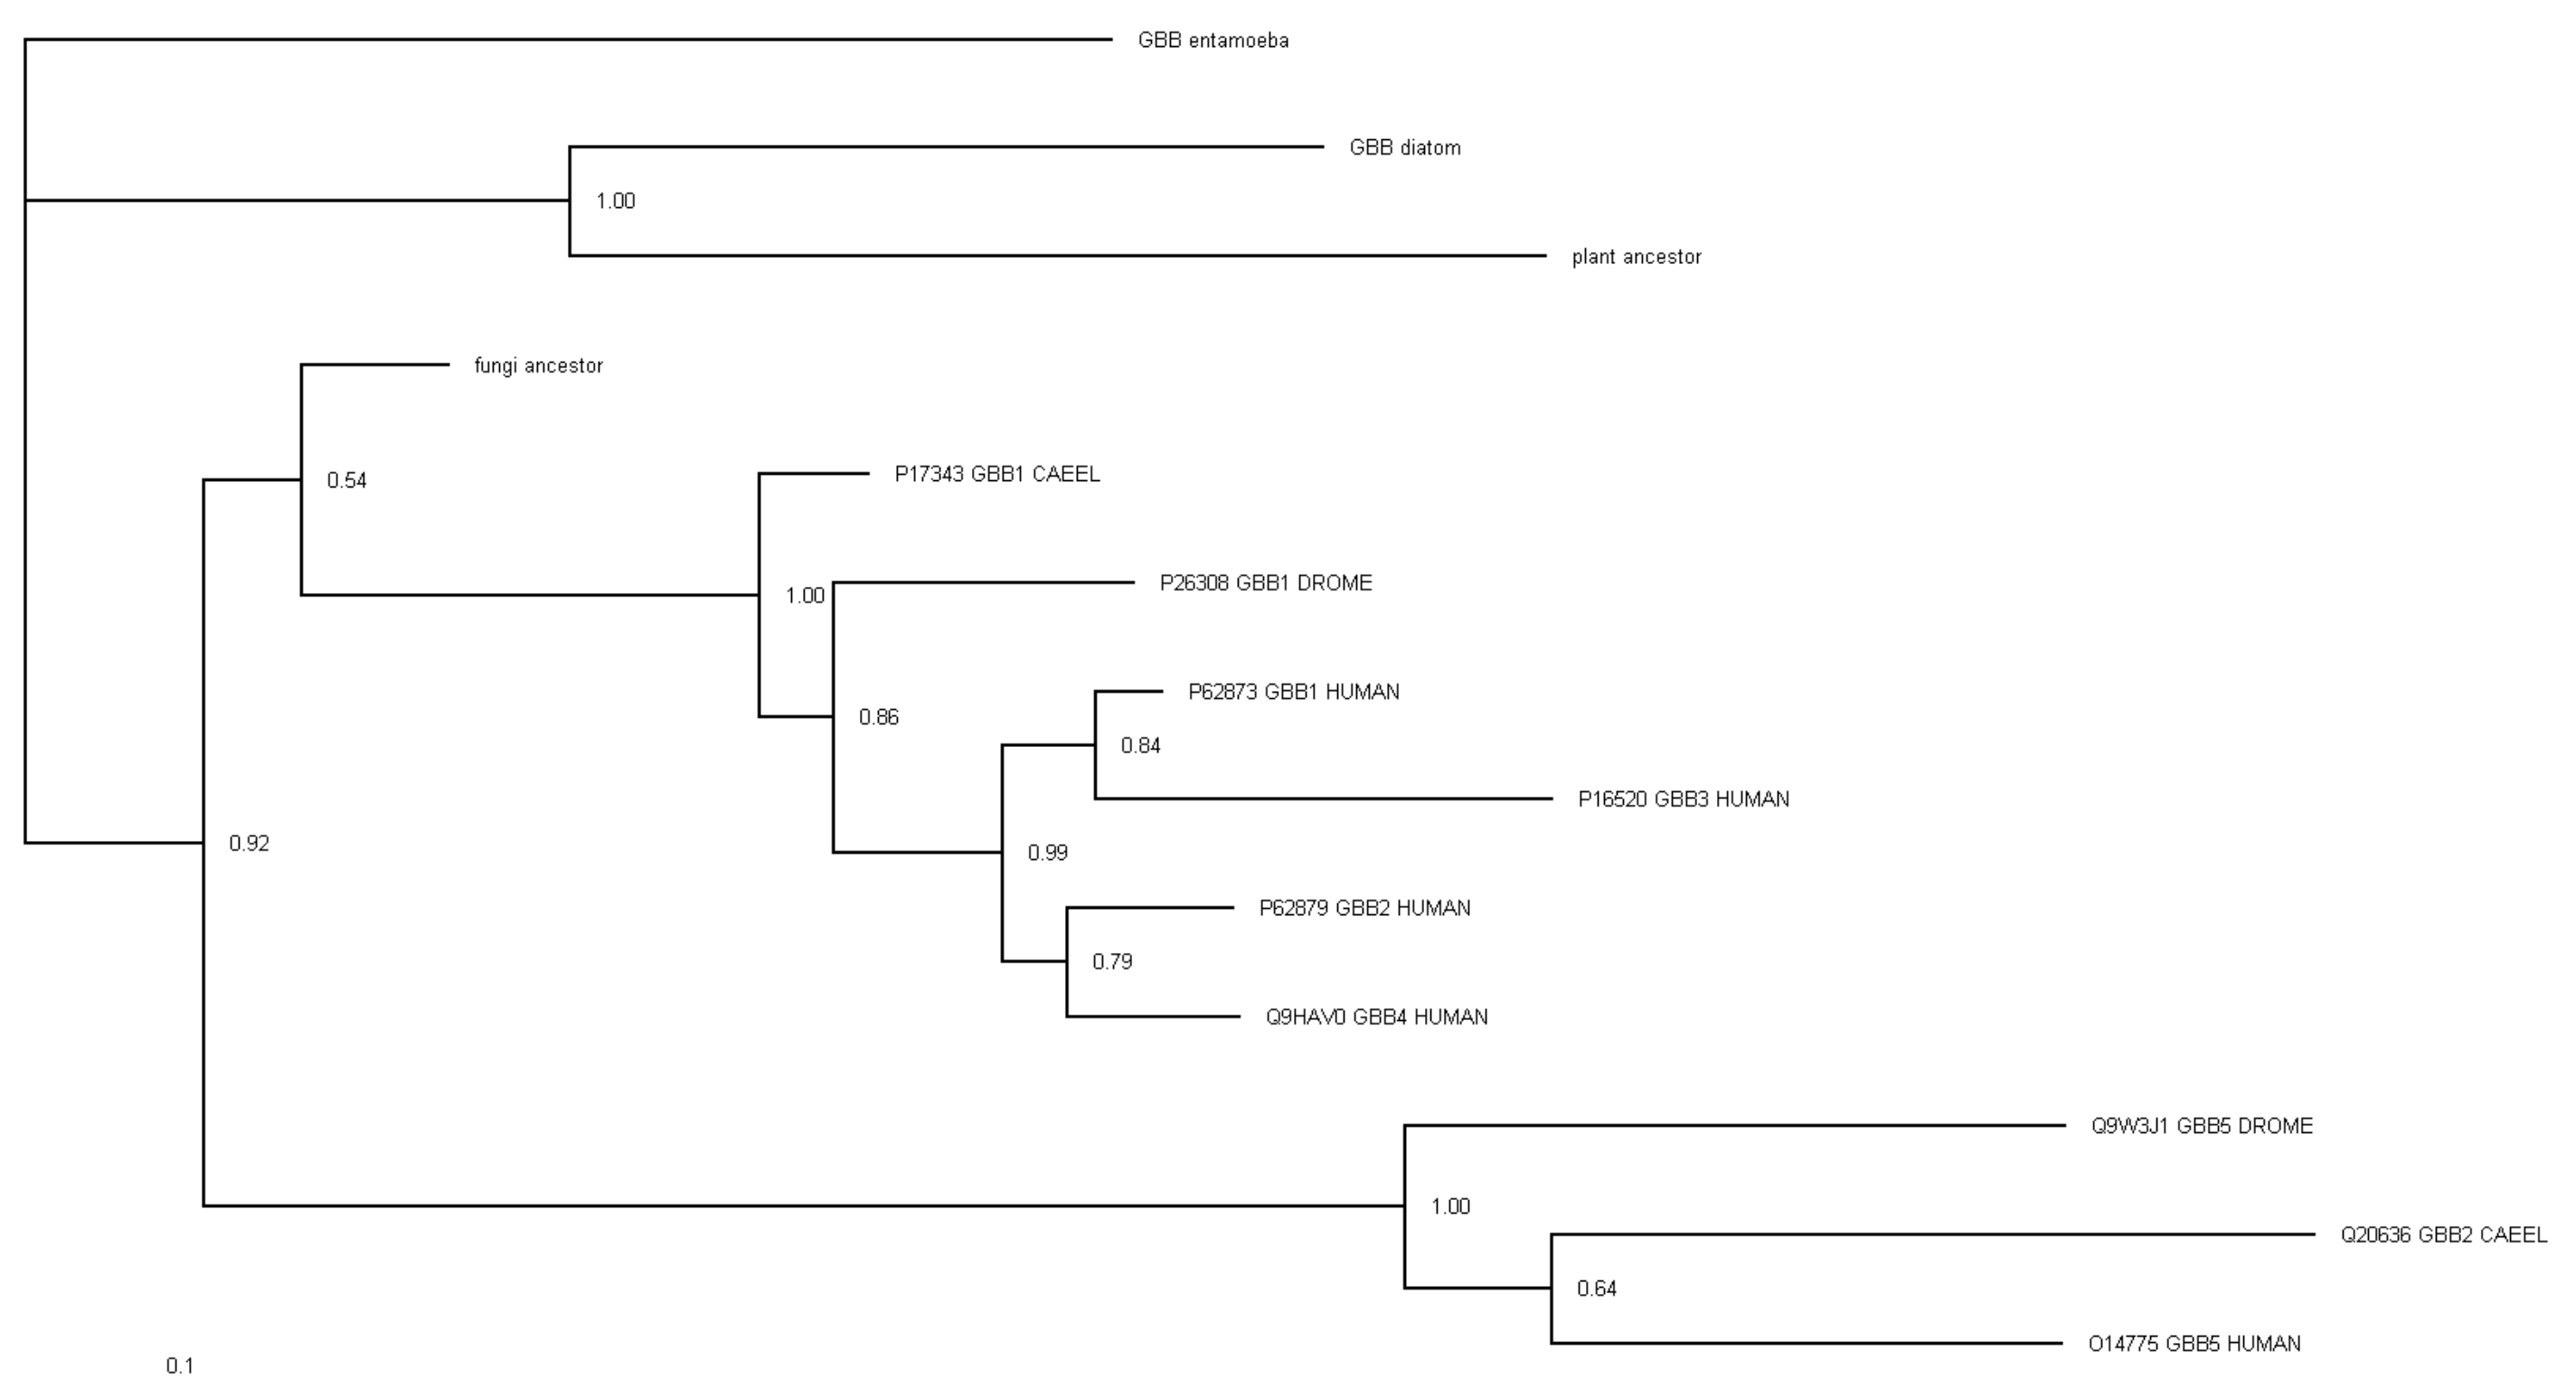

Supplement: NIHMS140695-supplement-04.pdf [file NIHMS140695-supplement-04.pdf]
